# Supplementary material for: Tuning the formation of dicarboxylate linker-assisted supramolecular 1D chains and squares of Ni(ii) using coordination and hydrogen bonds
Source: Royal Society of Chemistry journal article supplement (doi:10.1039/c4ce00434e), 2014-01-01
Supplement: c4ce00434e1.pdf [file c4ce00434e1.pdf]

# Tuning the formation of dicarboxylate linker-assisted supramolecular 1D chains and squares of Ni(II) using coordination and hydrogen bonds

**Sadhika Khullar, Vijay Gupta and Sanjay K. Mandal\***

*Department of Chemical Sciences, Indian Institute of Science Education and Research, Mohali, Sector 81, Manauli PO, S.A.S. Nagar, Mohali (Punjab) 140306, INDIA*

**Electronic Supplementary Information**

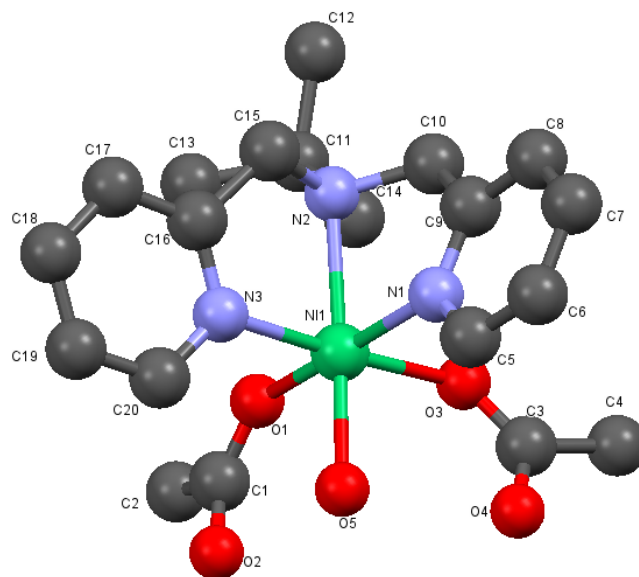

**Fig S1.** A schematic view of **1** with an atom labeling scheme; hydrogen atoms are omitted for clarity.

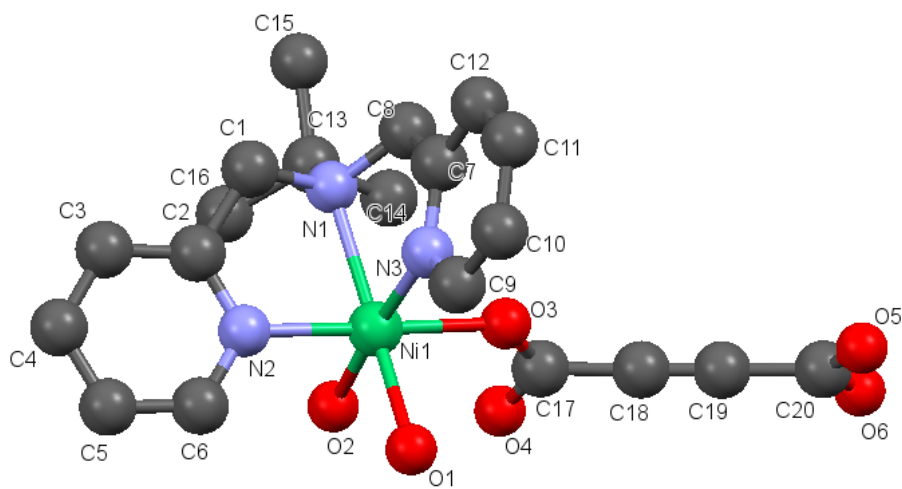

**Fig S2.** A schematic view of **2** with an atom labeling scheme; hydrogen atoms are omitted for clarity.

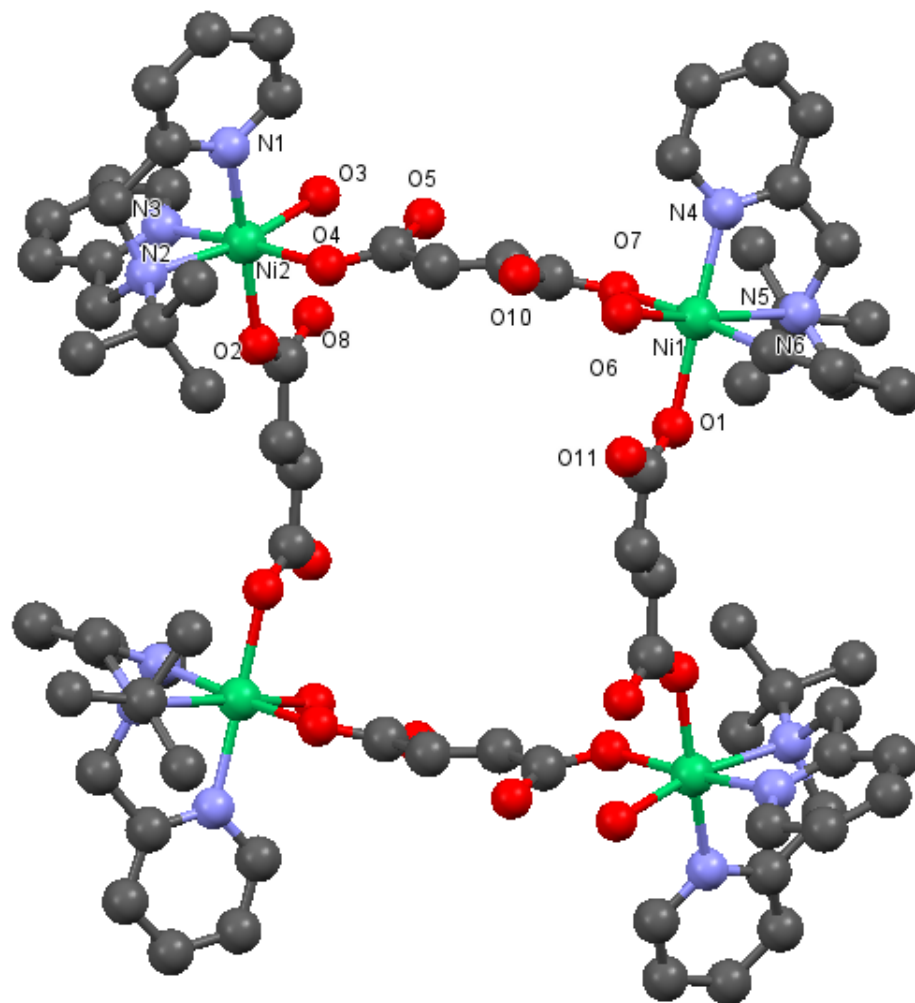

**Fig. S3** A schematic view of **3** with an atom labeling scheme; hydrogen atoms are omitted for clarity.

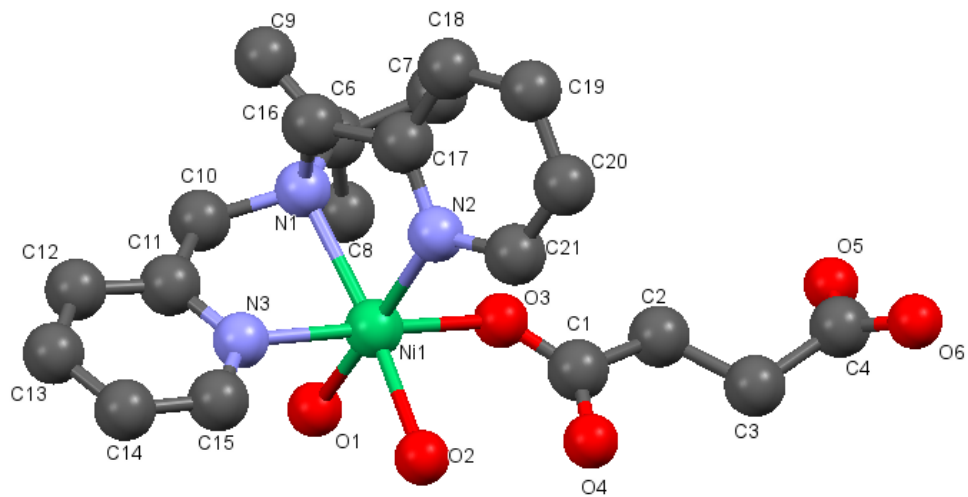

**Fig. S4** A schematic view of **4** with an atom labeling scheme; hydrogen atoms are omitted for clarity.

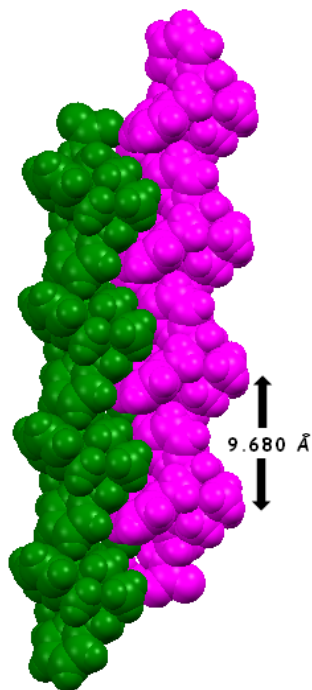

**Fig. S5** A helical view of the two adjacent 1D chains in **4**.

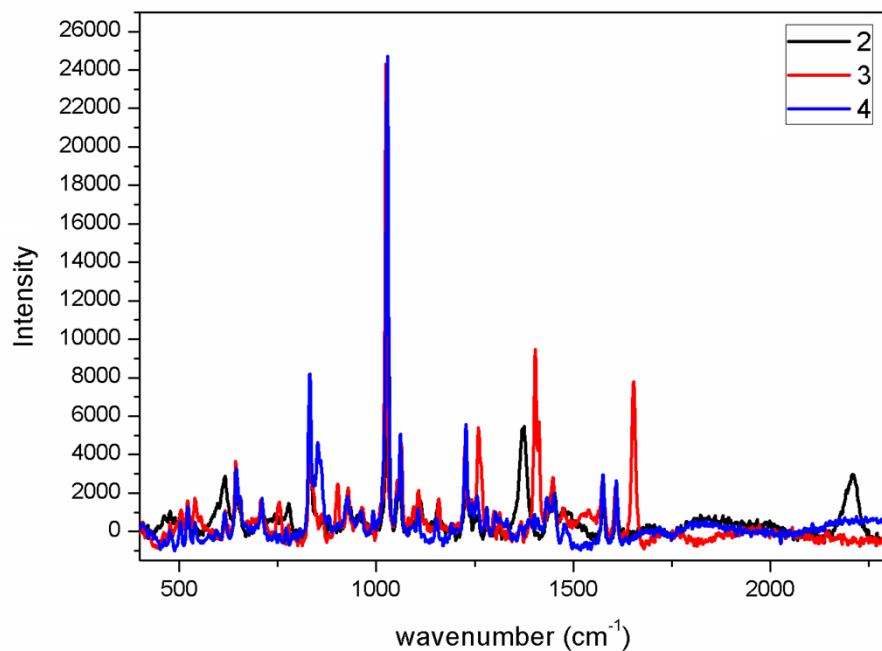

**Fig. S6** Raman spectra of **2-4**.

**Table S1.** Selected Bond distances and bond angles for **1, 2, 3** and **4**.

## **1**

### **Bond distances (Å)**

|        |          |        |          |
|--------|----------|--------|----------|
| Ni1-N1 | 2.063(3) | Ni1-O1 | 2.021(2) |
| Ni1-N2 | 2.255(2) | Ni1-O3 | 2.092(2) |
| Ni1-N3 | 2.061(2) | Ni1-O5 | 2.079(2) |

### **Bond angles (°)**

|           |           |           |           |
|-----------|-----------|-----------|-----------|
| O1-Ni1-N3 | 91.97(10) | O1-Ni1-N1 | 172.32(9) |
| N3-Ni1-N1 | 93.66(10) | O1-Ni1-O5 | 91.05(9)  |
| N3-Ni1-O5 | 91.07(9)  | N1-Ni1-O5 | 94.05(9)  |
| O1-Ni1-O3 | 89.49(9)  | N3-Ni1-O3 | 176.74(9) |
| N1-Ni1-O3 | 84.62(9)  | O5-Ni1-O3 | 91.82(8)  |
| O1-Ni1-N2 | 96.99(9)  | N3-Ni1-N2 | 80.63(9)  |
| N1-Ni1-N2 | 78.82(9)  | O5-Ni1-N2 | 168.60(8) |
| O3-Ni1-N2 | 96.30(8)  |           |           |

## 2

### Bond distances (Å)

|        |          |        |            |
|--------|----------|--------|------------|
| Ni1-N1 | 2.257(2) | Ni1-O1 | 2.082(2)   |
| Ni1-N2 | 2.062(2) | Ni1-O3 | 2.0779(18) |
| Ni1-N3 | 2.055(2) | Ni1-O2 | 2.083(2)   |

### Bond angles (°)

|           |           |           |           |
|-----------|-----------|-----------|-----------|
| N3-Ni1-N2 | 95.22(9)  | N3-Ni1-O3 | 85.43(8)  |
| N2-Ni1-O3 | 177.96(8) | N3-Ni1-O1 | 175.13(8) |
| N2-Ni1-O1 | 89.65(8)  | O3-Ni1-O1 | 89.71(8)  |
| N3-Ni1-O2 | 91.65(8)  | N2-Ni1-O2 | 93.50(9)  |
| O3-Ni1-O2 | 88.41(8)  | O1-Ni1-O2 | 87.99(8)  |
| N3-Ni1-N1 | 78.20(8)  | N2-Ni1-N1 | 80.85(8)  |
| O3-Ni1-N1 | 97.41(8)  | O1-Ni1-N1 | 102.70(8) |
| O2-Ni1-N1 | 167.79(8) |           |           |

## 3

### Bond distances (Å)

|        |          |        |          |
|--------|----------|--------|----------|
| Ni1-N4 | 2.056(3) | Ni1-O1 | 2.072(3) |
| Ni1-N5 | 2.272(4) | Ni2-O2 | 2.051(3) |
| Ni1-N6 | 2.084(4) | Ni2-O3 | 2.080(3) |
| Ni2-N1 | 2.061(3) | Ni2-O4 | 2.050(3) |
| Ni2-N2 | 2.212(4) | Ni1-O6 | 2.037(3) |
| Ni2-N3 | 2.084(4) | Ni1-O7 | 2.086(3) |

### Bond angles (°)

|           |            |           |            |
|-----------|------------|-----------|------------|
| O6-Ni1-N4 | 89.29(12)  | O6-Ni1-O1 | 88.78(12)  |
| N4-Ni1-O1 | 175.69(13) | O6-Ni1-N6 | 176.01(12) |
| N4-Ni1-N6 | 94.35(14)  | O1-Ni1-N6 | 87.48(13)  |
| O6-Ni1-O7 | 91.99(11)  | N4-Ni1-O7 | 92.78(12)  |
| O1-Ni1-O7 | 91.14(11)  | N6-Ni1-O7 | 89.46(13)  |
| O6-Ni1-N5 | 100.68(12) | N4-Ni1-N5 | 79.43(13)  |
| O1-Ni1-N5 | 97.15(12)  | N6-Ni1-N5 | 78.44(14)  |
| O7-Ni1-N5 | 164.96(12) | O4-Ni2-O2 | 88.77(11)  |
| O4-Ni2-N1 | 86.04(12)  | O2-Ni2-N1 | 171.59(13) |

|           |            |           |            |
|-----------|------------|-----------|------------|
| O4-Ni2-O3 | 90.22(12)  | O2-Ni2-O3 | 92.10(11)  |
| N1-Ni2-O3 | 94.52(13)  | O4-Ni2-N3 | 175.15(12) |
| O2-Ni2-N3 | 86.39(12)  | N1-Ni2-N3 | 98.78(13)  |
| O3-Ni2-N3 | 89.93(14)  | O4-Ni2-N2 | 101.20(13) |
| O2-Ni2-N2 | 94.00(12)  | N1-Ni2-N2 | 80.55(14)  |
| O3-Ni2-N2 | 167.15(12) | N3-Ni2-N2 | 79.20(14)  |

## 4

### Bond distances (Å)

|        |          |        |          |
|--------|----------|--------|----------|
| Ni1-N1 | 2.230(4) | Ni1-O1 | 2.055(4) |
| Ni1-N2 | 2.112(3) | Ni1-O2 | 2.112(3) |
| Ni1-N3 | 2.072(4) | Ni1-O3 | 2.054(3) |

### Bond angles (°)

|           |            |           |            |
|-----------|------------|-----------|------------|
| O3-Ni1-O1 | 88.75(16)  | O3-Ni1-N2 | 87.75(14)  |
| O1-Ni1-N2 | 173.32(16) | O3-Ni1-N3 | 175.84(15) |
| O1-Ni1-N3 | 87.16(16)  | N2-Ni1-N3 | 96.24(15)  |
| O3-Ni1-O2 | 90.38(14)  | O1-Ni1-O2 | 89.90(15)  |
| N2-Ni1-O2 | 95.81(15)  | N3-Ni1-O2 | 90.39(15)  |
| O3-Ni1-N1 | 100.58(13) | O1-Ni1-N1 | 94.74(14)  |
| N2-Ni1-N1 | 80.32(14)  | N3-Ni1-N1 | 79.00(14)  |
| O2-Ni1-N1 | 168.17(14) |           |            |
